# Supplementary material
Source: publisher site journal article supplement (https://jmir.org/api/download?alt_name=publichealth_v7i2e24429_app4.pdf&filename=2966e5c30db5bf18a2bd4ab5bc4d1414.pdf)
Supplement: Supplementary file [file download]

**Table 4.** Effects of message type (paid ad vs. organic messages) on wCTR for the analysis of 1275 antismoking health messages that were posted across 3 social media platforms (Twitter, Facebook, and Instagram) between April 19 and July 12, 2017.

| <b>Variable</b> | <b>N</b> | <b>wCTR<br/>(N=700)</b>       | <b>Comparison</b>   | <b>P<sup>a</sup></b> |
|-----------------|----------|-------------------------------|---------------------|----------------------|
| <b>Ad type</b>  | 700      |                               | Organic vs.<br>Paid | P<.001               |
| <b>Organic</b>  | 78       | 0.0384<br>(0.0006,<br>0.0762) |                     |                      |
| <b>Paid</b>     | 622      | 0.1719<br>(0.1531,<br>0.1906) |                     |                      |

<sup>a</sup>P-values were obtained using multilevel mixed-effects negative binomial regression, followed by calculation of marginal means.
